# Supplementary material for: Genome Analysis of Bacteriophage (U1G) of <em>Schitoviridae</em>, Host Receptor Prediction using Machine Learning Tools and its Evaluation to Mitigate Colistin Resistant Clinical Isolate of<em> Escherichia Coli</em> <em>In Vitro</em> and <em>In Vivo</em>
Source: Preprints.org preprint supplement (doi:10.20944/preprints202301.0036.v1), 2023-01-04
Supplement: Supplementary file 1 [file supplementary]

**Supplementary Information:**

**Genome Analysis of Bacteriophage (U1G) of *Schitoviridae*, host receptor prediction  
using machine learning tools and its evaluation to mitigate colistin resistant clinical  
isolate of *Escherichia coli* *in vitro* and *in vivo***

Niranjana Sri Sundaramoorthy<sup>a,b</sup>, Vineetha KU<sup>a</sup> Jean Sophy Roy<sup>a</sup>, , Sneha Srinath<sup>c</sup>, Santhosh Kumar S<sup>c</sup>, Suma Mohan S.<sup>\*c</sup> and Saisubramanian Nagarajan<sup>a,d,\*</sup>

<sup>a</sup> Center for Research on Infectious Diseases (CRID), School of Chemical and Biotechnology, SASTRA Deemed University, Tamil Nadu, India

<sup>b</sup> Translational Health Sciences Technology Institute, Faridabad

<sup>c</sup> Department of Bioinformatics, School of Chemical and Biotechnology, SASTRA Deemed University, Tamil Nadu, India

<sup>d</sup> Antimicrobial Resistance Lab, ASK-I-312, School of Chemical and Biotechnology, SASTRA Deemed University, Tamil Nadu, India

\*Jointly Communicated

Communicating Authors

Dr. Saisubramanian Nagarajan

Mail id: [sai@scbt.sastra.edu](mailto:sai@scbt.sastra.edu)

Dr. Suma Mohan

Mail id: [sumamohan@scbt.sastra.edu](mailto:sumamohan@scbt.sastra.edu)

**Supplementary Figure 1:** Spot assay showing the presence of bacteriophages specific to U1007. 1- Water sample from Madurai Pond 1, 2- Cow's urine sample from Madurai, 3- Water sample from Madurai pond 2, 4 – Urine sample from cow shed at Perambalur, 5 – Dung sample from cow shed at Perambalur, 6 – Water sample from Cauvery river, 7 – Urine sample from SASTRA cow shed, 8 – Dung sample from SASTRA cow shed, 9 – Soil sample from a corn farm, 10 – Soil sample from a onion farm, 11 – Water sample from Ganges river

A) U3790

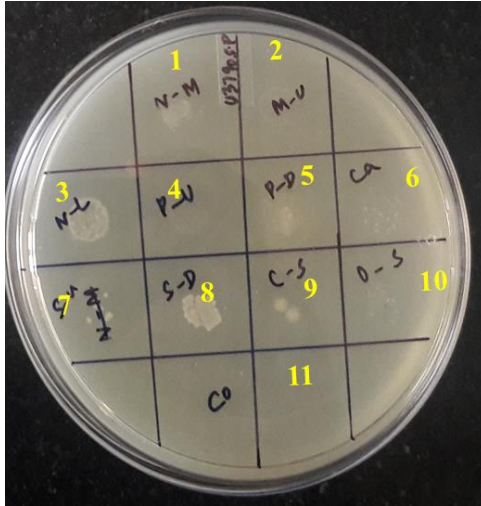

B) U1007

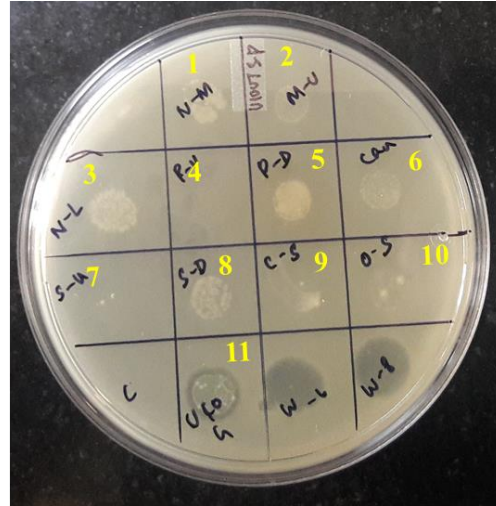

**Supplementary Figure 2:** Presence of four intact prophages in U3790 genome was revealed by PHASTER

| Region                               | Region Length | Completeness | Score | # Total Proteins | Region Position | Most Common Phage                         | GC %   | Details |
|--------------------------------------|---------------|--------------|-------|------------------|-----------------|-------------------------------------------|--------|---------|
| NODE_9_length_129282_cov_67.389305   |               |              |       |                  |                 |                                           |        |         |
| 1                                    | 45.9Kb        | Intact       | 150   | 62               | 2524-48426 ⓘ    | PHAGE_Enterolambda_NC_001416(16)          | 51.18% | Show ⓘ  |
| NODE_10_length_177737_cov_79.538818  |               |              |       |                  |                 |                                           |        |         |
| 2                                    | 33.5Kb        | Intact       | 150   | 47               | 11188-44778 ⓘ   | PHAGE_Enterolambda_NC_005340(32)          | 51.38% | Show ⓘ  |
| NODE_107_length_19573_cov_60.439331  |               |              |       |                  |                 |                                           |        |         |
| 3                                    | 19.1Kb        | Intact       | 150   | 28               | 533-19661 ⓘ     | PHAGE_Enterolambda_NC_001416(17)          | 51.13% | Show ⓘ  |
| NODE_155_length_367585_cov_77.509048 |               |              |       |                  |                 |                                           |        |         |
| 4                                    | 49.6Kb        | Incomplete   | 60    | 66               | 297859-347526 ⓘ | PHAGE_Shigellae_SF6_NC_005344(22)         | 45.29% | Show ⓘ  |
| NODE_206_length_100715_cov_65.478035 |               |              |       |                  |                 |                                           |        |         |
| 5                                    | 20Kb          | Incomplete   | 40    | 13               | 80775-100801 ⓘ  | PHAGE_Salmonella_118970_sal3_NC_031940(3) | 45.08% | Show ⓘ  |
| NODE_286_length_43220_cov_66.661293  |               |              |       |                  |                 |                                           |        |         |
| 6                                    | 38.7Kb        | Intact       | 150   | 51               | 4526-43234 ⓘ    | PHAGE_Pseudomonas_phiPSA1_NC_024365(7)    | 45.97% | Show ⓘ  |

**Supplementary Figure 3: Phylogenetic tree of the tailspike protein** Phylogenetic tree of the tailspike protein constructed with the UPGMA method with 1000 bootstrap values using MEGA11. The homologs of the tail spike protein of U1G from other bacteriophages were obtained using BLASTp search.

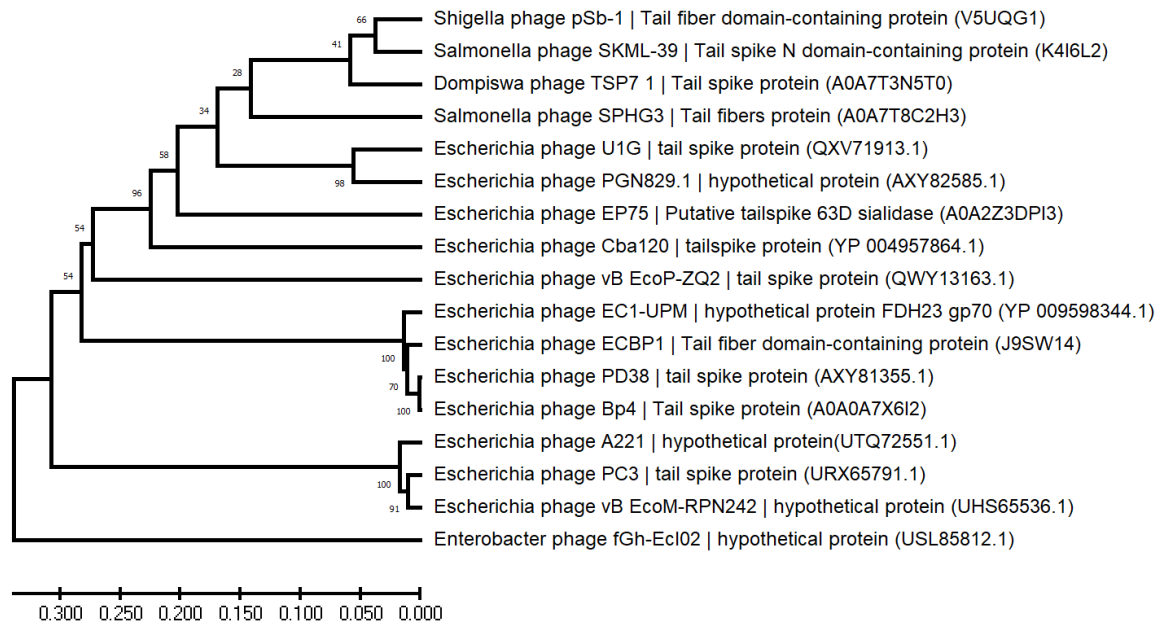

## Supplementary Figure 4: Genome alignment of the close homologs of Escherichia phage

UIG with Mauve

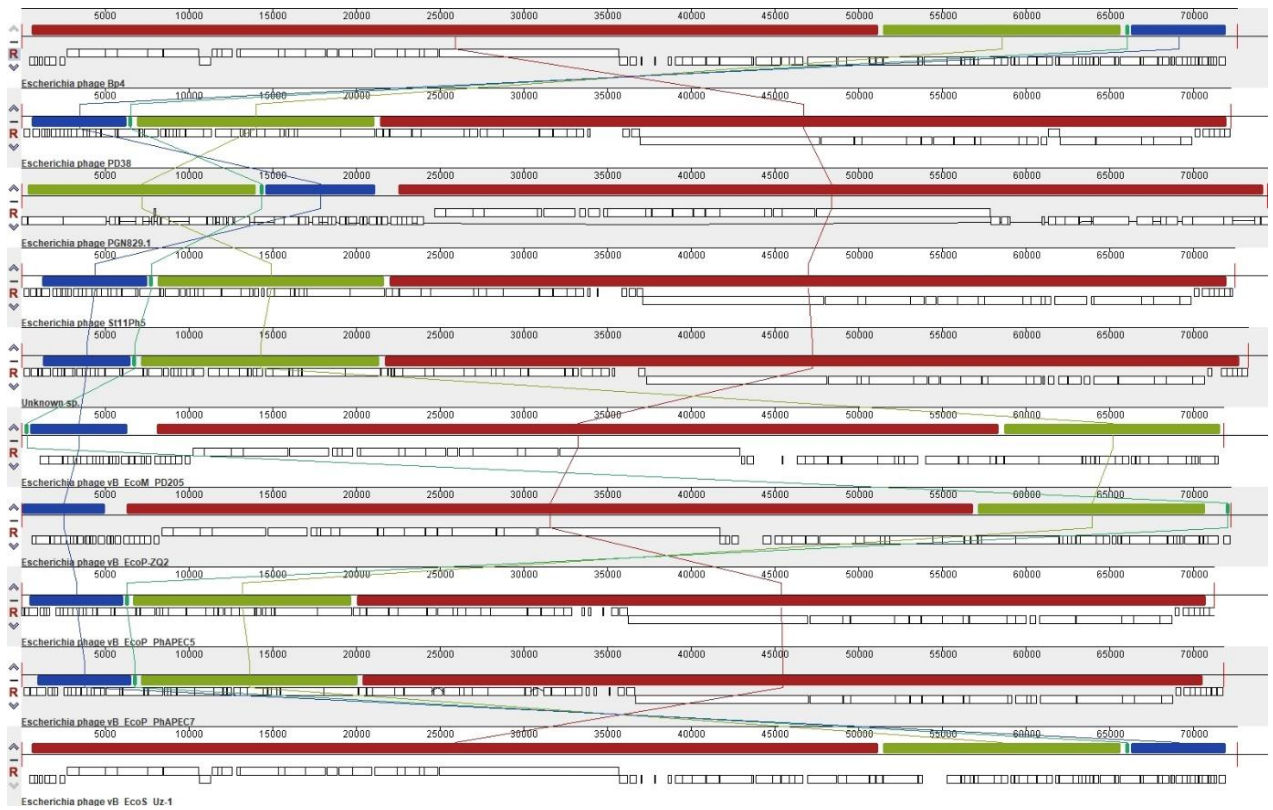

**Supplementary Figure 5:** One-step growth curve of U1G

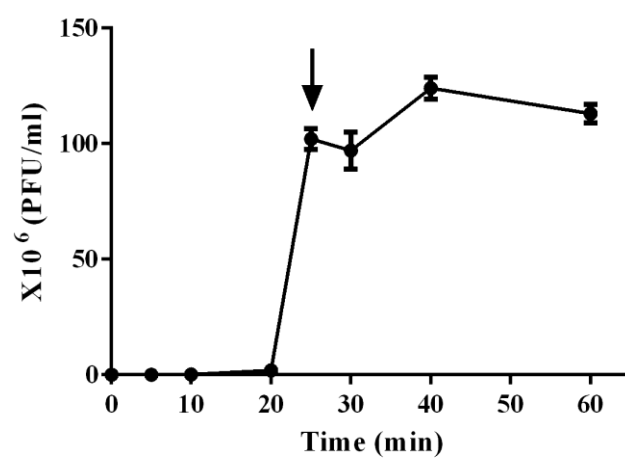

**Supplementary Figure 6.** U1G is highly specific to U1007, with a slight lysis against U3790.

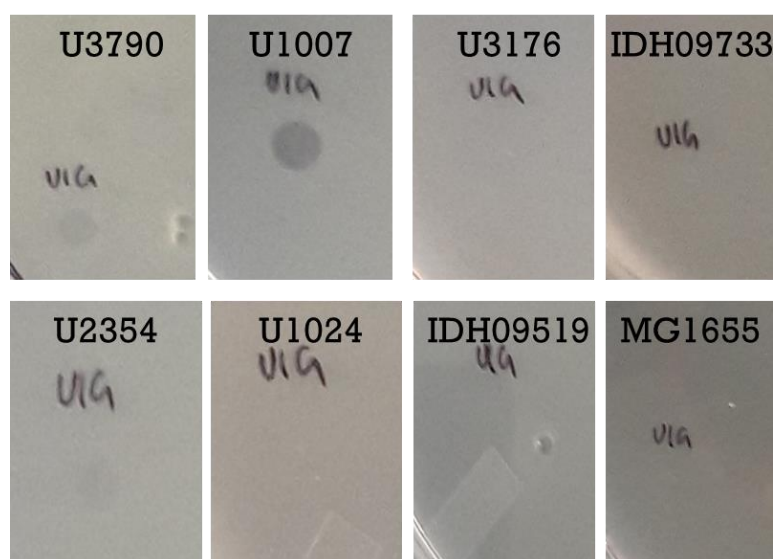

**Supplementary Figure 7:** U1G was non-toxic to zebrafish at different concentrations as evidenced by brain and liver enzyme profiles.

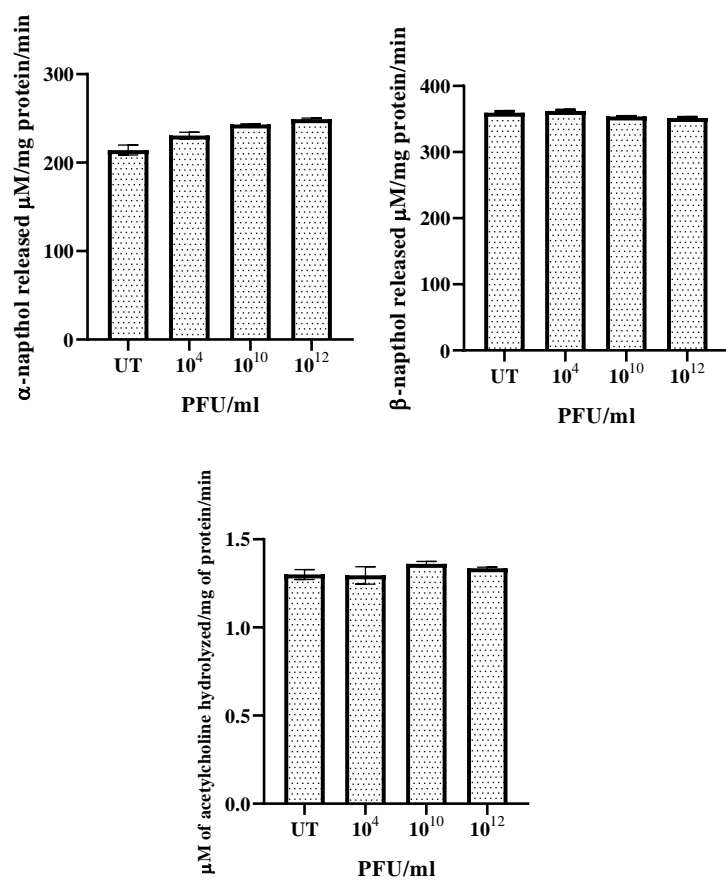



**Supplementary figure 8:** The receptor label distribution in the dataset with multiple entries.

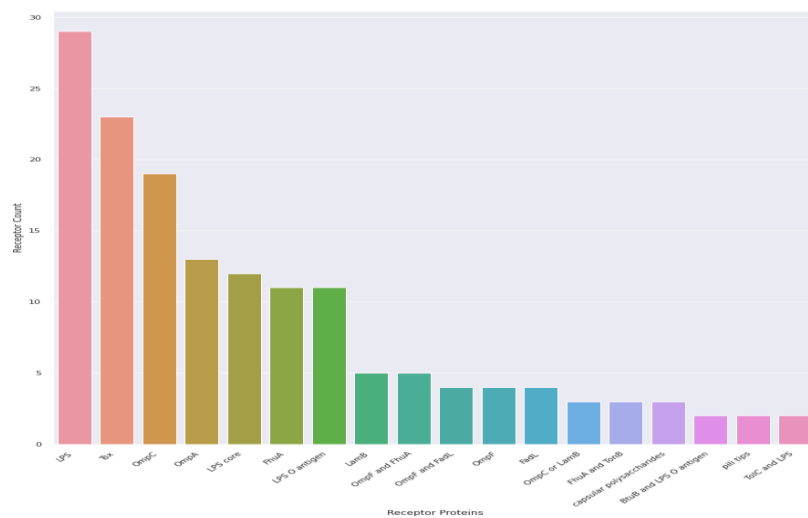

**Supplementary Table 1: Features of U1G genome annotated by RAST and PHASTER**

| <b>Start</b> | <b>Stop</b> | <b>RAST</b>                                     | <b>PHASTER</b>                          |
|--------------|-------------|-------------------------------------------------|-----------------------------------------|
| 170          | 493         | Phage protein                                   | hypothetical protein                    |
| 584          | 943         | hypothetical protein                            | hypothetical protein                    |
| 997          | 1203        | hypothetical protein                            | Major Capsid protein                    |
| 1330         | 1713        | Phage integrase                                 | hypothetical protein                    |
| 1857         | 2156        | hypothetical protein                            | hypothetical protein                    |
| 2159         | 2377        | hypothetical protein                            | -                                       |
| 2374         | 2547        | hypothetical protein                            | -                                       |
| 2571         | 3044        | Phage HNH homing endonuclease (ACLAME 27)       | gp59                                    |
| 3049         | 3180        | hypothetical protein                            | hypothetical protein                    |
| 3314         | 3622        | hypothetical protein                            | hypothetical protein                    |
| 3619         | 3840        | hypothetical protein                            | hypothetical protein                    |
| 3837         | 4094        | hypothetical protein                            | hypothetical protein                    |
| 4091         | 4411        | Phage antirepressor protein                     | hypothetical protein                    |
| 4414         | 4596        | hypothetical protein                            | hypothetical protein                    |
| 4593         | 4973        | hypothetical protein                            | hypothetical protein                    |
| 5027         | 5845        | hypothetical protein                            | RNA polymerase RNAP1                    |
| 5835         | 5996        | hypothetical protein                            | hypothetical protein                    |
| 6043         | 7260        | hypothetical protein                            | T7-like RNA polymerase                  |
| 7318         | 7500        | hypothetical protein                            | -                                       |
| 7575         | 8408        | Phage fibrin (wac) protein                      | Multi domain protein                    |
| 8474         | 8788        | Superinfection exclusion protein (Protein gp17) | Capsid decoration protein               |
| 8893         | 9081        | hypothetical protein                            | hypothetical protein                    |
| 9078         | 9338        | hypothetical protein                            | hypothetical protein                    |
| 9335         | 9520        | hypothetical protein                            | hypothetical protein                    |
| 9521         | 9847        | hypothetical protein                            | hypothetical protein                    |
| 9882         | 10202       | Phage protein                                   | hypothetical protein                    |
| 10313        | 10882       | HNH homing endonuclease # Phage intron          | Putative homing endonuclease HNH family |
| 11142        | 11816       | Phage protein                                   | hypothetical protein                    |

|       |       |                                                 |                                                  |
|-------|-------|-------------------------------------------------|--------------------------------------------------|
| 11824 | 12327 | hypothetical protein                            | hypothetical protein                             |
| 12324 | 12998 | hypothetical protein                            | hypothetical protein                             |
| 12998 | 13504 | Phage protein                                   | deoxycytidine triphosphate deaminase             |
| 13514 | 13723 | hypothetical protein                            | hypothetical protein                             |
| 13797 | 14039 | hypothetical protein                            | -                                                |
| 14055 | 14387 | hypothetical protein                            | hypothetical protein                             |
| 14554 | 14997 | hypothetical protein                            | hypothetical protein                             |
| 14997 | 15941 | Phage protein                                   | hypothetical protein                             |
| 16009 | 16221 | hypothetical protein                            | hypothetical protein                             |
| 16214 | 16543 | Phage protein                                   | hypothetical protein                             |
| 16536 | 16730 | hypothetical protein                            | hypothetical protein                             |
| 16774 | 19341 | Phage rIIA lysis inhibitor                      | rIIA lysis inhibitor                             |
| 19346 | 21406 | hypothetical protein                            | rIIB protector from prophage-induced early lysis |
| 21469 | 21864 | hypothetical protein                            | hypothetical protein                             |
| 21911 | 22045 | hypothetical protein                            | hypothetical protein                             |
| 22108 | 22233 | Phage protein                                   | hypothetical protein                             |
| 22725 | 24077 | Phage DNA helicase                              | Putative HNH homing endonuclease                 |
| 24088 | 24618 | hypothetical protein                            | hypothetical protein                             |
| 24628 | 26442 | DNA polymerase I (EC 2.7.7.7), phage-associated | DNA polymerase I                                 |
| 26439 | 27095 | Phage protein (ACLAME 141)                      | hypothetical protein                             |
| 27076 | 28047 | DNA polymerase I (EC 2.7.7.7), phage-associated | DNA polymerase I                                 |
| 28044 | 28349 | hypothetical protein                            | hypothetical protein                             |
| 28349 | 28822 | hypothetical protein                            | hypothetical protein                             |
| 28822 | 29799 | hypothetical protein                            | HNH endonuclease                                 |
| 29796 | 30233 | Phage-associated homing endonuclease            | -                                                |
| 30276 | 32426 | Phage-associated DNA primase                    | hypothetical protein                             |
| 32483 | 32884 | Phage protein                                   | hypothetical protein                             |
| 32950 | 33234 | Phage protein                                   | hypothetical protein                             |
| 33430 | 34071 | hypothetical protein                            | Single-stranded DNA binding protein              |
| 34071 | 34625 | hypothetical protein                            | hypothetical protein                             |

|       |       |                                          |                                     |
|-------|-------|------------------------------------------|-------------------------------------|
| 34627 | 35067 | hypothetical protein                     | hypothetical protein                |
| 35299 | 35412 | hypothetical protein                     | hypothetical protein                |
| 36836 | 37216 | hypothetical protein                     | hypothetical protein                |
| 48080 | 37326 | DNA polymerase, phage-associated         | Gram positive anchor domain protein |
| 49890 | 48175 | hypothetical protein                     | Putative structural protein         |
| 50138 | 49884 | hypothetical protein                     | 66 kDa protein                      |
| 50594 | 50151 | hypothetical protein                     | 16.5 kDa protein                    |
| 53262 | 50608 | hypothetical protein                     | hypothetical protein                |
| 54100 | 53264 | hypothetical protein                     | hypothetical protein                |
| 54809 | 54177 | hypothetical protein                     | hypothetical protein                |
| 56085 | 54883 | hypothetical protein                     | Major coat protein                  |
| 57322 | 56102 | Phage tape measure protein               | hypothetical protein                |
| 57686 | 57342 | Phage protein                            | hypothetical protein                |
| 59970 | 57700 | Phage portal (connector) protein         | 94 kDa protein                      |
| 60479 | 59973 | hypothetical protein                     | hypothetical protein                |
| 60891 | 60460 | Phage protein                            | hypothetical protein                |
| 61094 | 60996 | hypothetical protein                     | -                                   |
| 61657 | 61328 | Phage tail length tape-measure protein T | hypothetical protein                |
| 62449 | 61916 | hypothetical protein                     | hypothetical protein                |
| 63285 | 62485 | hypothetical protein                     | hypothetical protein                |
| 63800 | 63477 | Phage tailspike protein                  | hypothetical protein                |
| 65447 | 64050 | hypothetical protein                     | Tail fibre protein                  |
| 67642 | 65492 | hypothetical protein                     | Tail fibre protein                  |
| 68349 | 67639 | hypothetical protein                     | 30 kDa protein                      |
| 69945 | 68356 | Phage terminase, large subunit           | hypothetical protein                |
| 70627 | 69938 | hypothetical protein                     | hypothetical protein                |
| 70811 | 71089 | hypothetical protein                     | -                                   |
| 71654 | 71968 | hypothetical protein                     | hypothetical protein                |
| 71972 | 72292 | hypothetical protein                     | hypothetical protein                |
| 72292 | 72576 | hypothetical protein                     | hypothetical protein                |
| 72573 | 72887 | hypothetical protein                     | hypothetical protein                |
| 72877 | 73215 | hypothetical protein                     | hypothetical protein                |

**Supplementary table 2: The dataset with RBP and host receptor information used for building the ML models.**

<https://docs.google.com/spreadsheets/d/13BCVyxdjq-PVnH3MuY0T2RAiINW6wk5L/edit#gid=230086930>
